# Supplementary material
Source: publisher site journal article supplement (https://www.dovepress.com/get_supplementary_file.php?f=266428.docx)
Supplement: Supplementary file 1 [file get_supplementary_file.php]

# Appendices

# Appendix A Stata and R codes for the motivating example

1. We started with a THIN fully containing sex, age and smoking fully observed, but weight and date of weight as recorded (irregular recording overtime).
2. Time goes from 0 to 417 weeks, and week 209 marks the treatment initiation of olanzapine. The second knot is 215 weeks (+6 weeks after treatment initiation).
3. We fit crude and adjusted mixed effects models (MEM) with this full data, as follows:

mkspline ls1 209 ls2 215 ls3 = time

mixed weight ls1 ls2 ls3 || gppatid: ls1 ls2 ls3, cov(un) stddev reml

mixed weight ls1 ls2 ls3 sex age age_2 smoking || gppatid: ls1 ls2 ls3, cov(un) stddev reml

1. We also fit SR and SR-W1 models with same full data, as follows:

preserve

egen mean_sw1_weight = mean(weight), by(time)

egen count_sw1_weight = count(weight), by(time)

duplicates drop time mean_sw1_weight count_sw1_weight

glm mean_sw1_weight ls1 ls2 ls3 /*SR analysis*/

glm mean_sw1_weight ls1 ls2 ls3 [pw=count_sw1_weight] /*SR-W1 analysis*/

restore

1. Then, we set weight values MAR on sex, reproducing approximately the mechanism shown in Figure 1 (sex=0=men):

gen weight2 = weight

forvalues t=0(1)208 {

local p = (209-`t')*0.004

randomselect if (sex==0), gen(rs`t') prop(`p') seed(3956412)

replace weight2 =. if (rs`t'==1) & (time==`t')

}

randomselect if (sex==0), gen(rs209) prop(.20)

replace weight2 =. if (rs209==1) & (time==209)

randomselect if (sex==0), gen(rs210) prop(.30)

replace weight2 =. if (rs210==1) & (time==210)

randomselect if (sex==0), gen(rs211) prop(.40)

replace weight2 =. if (rs211==1) & (time==211)

randomselect if (sex==0), gen(rs212) prop(.50)

replace weight2 =. if (rs212==1) & (time==212)

randomselect if (sex==0), gen(rs213) prop(.60)

replace weight2 =. if (rs213==1) & (time==213)

randomselect if (sex==0), gen(rs214) prop(.70)

replace weight2 =. if (rs214==1) & (time==214)

randomselect if (sex==0), gen(rs215) prop(.80)

replace weight2 =. if (rs215==1) & (time==215)

forvalues t=216(1)417 {

local p = (`t'-215)*0.004

randomselect if (sex==0), gen(rs`t') prop(`p')

replace weight2 =. if (rs`t'==1) & (time==`t')

}

1. Then, we set smoking MAR on sex as follows:

drop rs* ls1 ls2 ls3 weight

reshape wide weight2 , i(gppatid) j(time)

randomselect if (sex==0), gen(smk_m) prop(.80)

replace smoking =. if (smk_m==1)

randomselect if (sex==1), gen(smk_f) prop(.20)

replace smoking =. if (smk_f==1)

reshape long

drop if weight2==.

mkspline ls1 209 ls2 215 ls3 = time

saveold phd_paper2_altana.dta, replace

1. We fit crude and adjusted mixed effects models (MEM) again, but now on incomplete data:

mixed weight2 ls1 ls2 ls3 || gppatid: ls1 ls2 ls3, cov(un) stddev reml

mixed weight2 ls1 ls2 ls3 sex age age_2 smoking || gppatid: ls1 ls2 ls3, cov(un) stddev reml

1. We imputed smoking status only by using MI-JOMO (using R and Stata):

###Preparing data

mydata <- read.dta13("phd_paper2_altana.dta")

mydata<-within(mydata, smoking<-factor(smoking))

mydata<-within(mydata, sex<-factor(sex))

mdata<-mydata[,c("gppatid","weight2","time","ls1","ls2","ls3","sex","age","age_2","smoking")]

###Running JOMO on missing data (MAR)

jdata<-mydata[,c("gppatid","weight2","ls1","ls2","ls3","sex","age","age_2","smoking")]

mylevel<-c(1,1,1,1,1,2,2,2,2)

formula<-as.formula(weight2 ~ sex + age + age_2 + smoking + ls1 + ls2 + ls3 + (1 + ls1 + ls2 +ls3|gppatid))

jomo.imp<-jomo.lmer(formula,jdata, level=mylevel, nimp=20, nburn=1000, nbetween=1000)

###Saving imputed data in Stata

write.dta(jomo.imp, "jomo_appexample_2.dta")

set more off

use "\\ad.ucl.ac.uk\homez\rmjlbaz\DesktopSettings\Desktop\phd paper 2 app exmpl\jomo_appexample_2.dta", clear

drop id

gen time = ls1 + ls2 + ls3

recode sex 1=0 2=1

recode smoking 1=0 2=1

mi import flong, id(clus time) m(Imputation) clear

mi estimate: mixed weight ls1 ls2 ls3 sex age age_2 smoking || clus: ls1 ls2 ls3, cov(un) stddev reml

1. Finally, we performed the SR and SR-W1 analyses with a previous averaging-step:

/*using same data than in step 7*/

preserve

egen mean_sw1_weight = mean(weight2), by(time)

egen count_sw1_weight = count(weight2), by(time)

sort time

duplicates drop time mean_sw1_weight count_sw1_weight

glm mean_sw1_weight ls1 ls2 ls3 /*SR analysis*/

glm mean_sw1_weight ls1 ls2 ls3 [pw=count_sw1_weight] /*SR-W1 analysis*/

restore

*Note: code for simulations (section 3) can be requested to the correspondent author.*

# Appendix B Motivating Example: 95% confidence intervals of cumulative weight

|  | | | | | | |
| --- | --- | --- | --- | --- | --- | --- |
| Model | N | Weight gained during short-time (0-6 weeks), in kilograms. | 95% CI | Weight gained during long-time (6 weeks-4 years), in kilograms. | 95% CI | Total weight gained, in kilograms |
| MEM | 3,379 | 2.47 | (1.99 to 2.95) | 2.46 | (1.62 to 3.29) | 4.93 |
| MI-JOMO with MEM | 6,181 | 2.75 | (2.39 to 3.10) | 2.70 | (2.03 to 3.35) | 5.45 |
| SR | 418 | 4.80 | (3.62 to 5.97) | 0.87 | (-0.57 to 2.34) | 5.67 |
| SR-W1 | 418 | 4.72 | (3.61 to 5.83) | 2.13 | (0.39 to 3.88) | 6.85 |
| *Cummulative weight gain was calculated using estimates from Table 1 (data with missing records).CI=confidence interval, MEM=mixed effects model, MI-JOMO with MEM=multilevel multiple imputation followed by a mixed effects model, SR=segmented regression, SR-W1=segmented regression weighted with the inverse of the number of weigh records observed at each time-point.* | | | | | | |

# Appendix C Supplementary figures

Figure B1. Missing data patterns in an example of MAR-1 and another example of MAR-2 datasets.


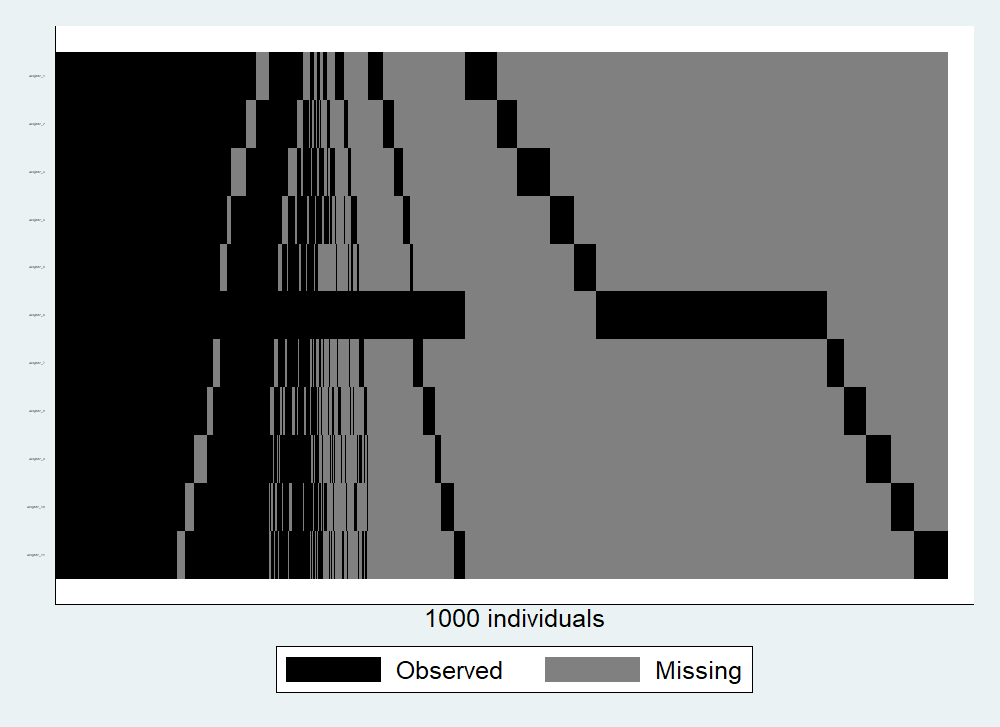

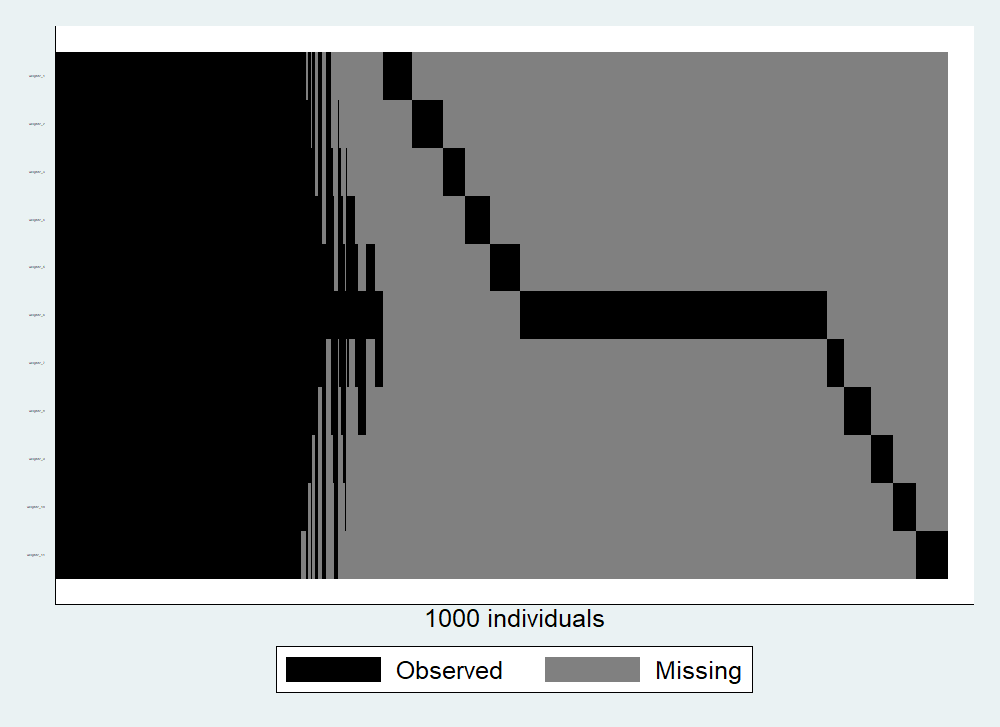


MAR-1

MAR-2

t = -5

t = 0

t = +5

t = -5

t = +5

t = 0

Figure B2. Missing data distributions in an example of MAR-1 and another example of MAR-2 datasets.

MAR-1

MAR-2

# Appendix D Summary of evaluated methods and scenarios

| **Study Section** | **Scenario** | **Missingness** | **Analysis methods evaluated** | **Results are visible in** |
| --- | --- | --- | --- | --- |
| Motivating Example (section 2) | Scenario 1 | Incomplete weight, all covariates complete | MEM unadjusted, MEM adjusted, SR, SR-W1 | Table 1, left section |
| Scenario 2 | Further incomplete weight (MAR), incomplete smoking (MAR), other covariates complete | MEM adjusted, MI-JOMO with MEM adjusted, SR, SR-W1 | Table 1, right section |
| Simulation Study (section 3) | Scenario 1a | Weight and all covariates complete | MEM adjusted, SR, SR-W1, SR-W2, Prais-Winsten | Table 2, top section |
| Scenario 1b | Incomplete weight (MAR on sex), all covariates complete |
| Scenario 2a | Weight and all covariates complete | Table 2, bottom section |
| Scenario 2b | Incomplete weight (MAR/MNAR on sex, age, smoking and intercept), smoking (MAR on sex and age), other covariates complete | MEM adjusted, MI-JOMO with MEM adjusted, SR, SR-W1, SR-W2, Prais-Winsten |
| *Scenarios 1a and 1b have same data gerenation mechanism= DGM-base. Scenarios 2a and 2b = DGM-extended-covariates. MAR=missing at random, SR='aggregate-level' segmented regression, SR-W1='aggregate-level' segmented regression weighted with the inverse of the number of observed weight records at each time point, SR-W2= similar to SR-W1 but the number of observed weight records were counted by each time point, sex and age group (quintiles), MEM=random intercept and slope model with restricted maximum likelihood and unstructure covariance, MI-JOMO=substantive model compatible joint modelling multiple imputation using a similar MEM model, Prais-Winsten= 'aggregate-level' Prais-Winsten regression.* | | | | |

# Appendix E Comments for applicative analyses

Researchers could eventually trust in MAR as a mechanism that is feasible to handle with traditional ITS tools. However, here we showed that MCAR is the only mechanism for which SR (with averaging-step) and mixed effects models (no averages at all) produce equally unbiased estimates. MCAR is rarely present in observational data.

In practice, two potential averaging-steps can generate bias when outcome data are MAR at the individual level. In the first step, the period for establishing temporal units is defined (e.g. a monthly unit for a follow-up period of 48 months) and all the outcome records from the same patient are averaged – or one of them could also be randomly selected within that period-. The average represents the outcome value for that patient in that month. If some days within the month inform the missing mechanism of the outcome, and the observed values are systematically lower or higher than missing values, then the average will be biased. The second step implies to average all patients’ weight averages within each month (e.g. population weight average for January, then for February, March, and so on). Now, if there is any covariate that can explain the outcome missingness and values at the individual level, that covariate will typically be lost after the second step (it becomes unobserved) and the ITS analysis will not be able to correct for bias. Considering the averaging issue studied by us, analysts should avoid any of these steps unless the individuals in the study are constant and fully observed over time (which is rarely the case in observational data).

In real data analysis, MEM and MI-JOMO present both advantages and disadvantages. MEM is computationally less demanding, does not raise congeniality issues and can include individuals with just one outcome observation in the analysis. However, MEM must omit any individual with missing covariates and, as we demonstrated, if these covariates explain the outcome missingness, we should expect biased estimates. Although in ITS designs we should not adjust for time-invariant confounders, with MEM we are forced to do it at least for those associated with the outcome missingness since MEM uses covariates information when its implicit imputation operates. Here is when multiple imputation becomes relevant. MI-JOMO can handle missing data in the covariates and can do it while keeping the congeniality issue controlled. The way we used MI-JOMO in our motivating example allows it to impute covariates values (smoking status) and not the outcome of interest (bodyweight in this case). After that, the implicit imputation of weight records by MEM operates similarly. This way to perform the analysis prevent many issues related to imputing outcomes as well (e.g. impute so many weight records missed). For example, whenever the outcome would also be imputed, MI-JOMO needs more outcome records to converge (number of observations>number of imputation parameters), and thus individuals with just a few outcome records must be removed from the analysis to overcome the problem. That kind of operation reduces the boundaries of MI-JOMO notably, so in practice, it is usually better to proceed as suggested in our study (only imputing covariates at baseline).
